# Supplementary material
Source: ML conference proceedings conference paper supplement (https://openaccess.thecvf.com/content/CVPR2026/html/Quan_ParticleGS_Learning_Neural_CVPR_2026_paper.html)
Supplement: Supplementary file 1 [file Supplementary_Material.pdf › Supplementary_Material.pdf]

# ParticleGS: Learning Neural Gaussian Particle Dynamics from Videos for Prior-free Physical Motion Extrapolation

## Supplementary Material

### 1. Appendix

The appendix includes:

- A Toy Experiment: Learning Dynamics vs. Memorizing Trajectories.
- Implementation Details.
- Additional Qualitative Comparisons.
- Full Quantitative Results.

### 2. A Toy Experiment: Learning Dynamics vs. Memorizing Trajectories

To intuitively understand the limitations of time-conditioned representations and the necessity of our physics-based approach, we conducted a toy experiment on a 2D damped harmonic oscillator system (a spiral trajectory), as shown in Fig. 1. We trained two models on the initial segment of the spiral (corrupted by random noise, indicated by green dots) and tested their ability to predict the future evolution (indicated by red dots).

**Analysis of Time-Conditioned Models.** As illustrated in Fig. 1(a), the baseline method, which models position as a direct function of time ( $x = \mathcal{F}(t)$ ), successfully interpolates the training points. However, it fails to extrapolate to the future. This is because the baseline essentially performs curve fitting on the time coordinate, memorizing the correlation between a specific timestamp  $t$  and a position  $x$  within the observed window. Once  $t$  extends beyond this range, the network lacks the underlying physical context to predict the future, reverting to linear behavior that violates the system’s inherent dynamics.

**Analysis of Neural ODEs.** In contrast, Fig. 1(b) demonstrates that the Neural ODE-based approach accurately predicts the future spiral motion. This success stems from the fact that Neural ODEs do not map time directly to position. Instead, they approximate the governing equation of the system:  $\frac{dx}{dt} = f(x, t)$ . While the position  $x(t)$  changes constantly, the physical law  $f$  governing the change remains consistent. By learning this derivative function from the observed past, the model can integrate the same law to generate physically plausible future states. This observation motivates ParticleGS to move from memorizing temporal deformations to learning the physical laws driving the system.

### 3. Implementation Details

**Input Representation.** To capture the comprehensive state of each Gaussian particle, we construct a 14-dimensional feature vector as the input to our network. Specifically, this

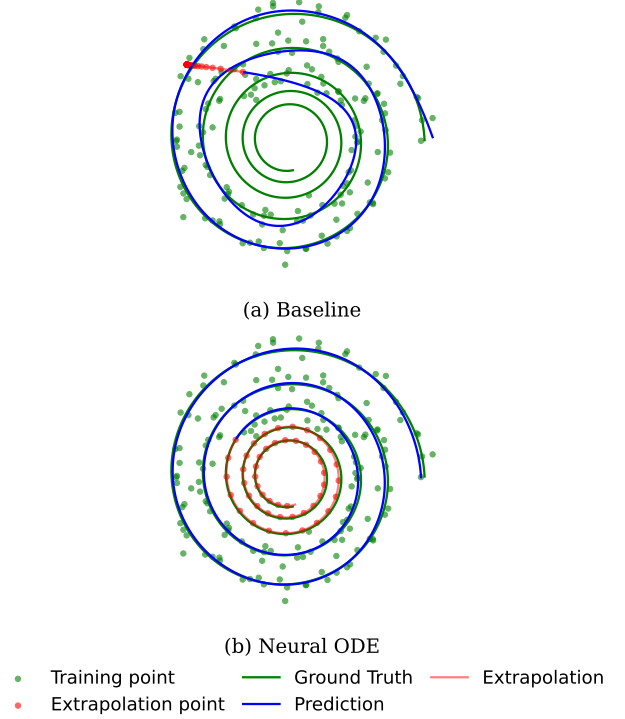

Figure 1. **Toy experiment on extrapolation capabilities.** We visualize the predicted trajectories on a 2D damped spiral. Green dots represent observed training data, while red dots indicate the unobserved future. **(a) Baseline:** The time-conditioned baseline fits the training data well but fails during extrapolation, producing a linear trajectory that deviates from the physical spiral. **(b) Neural ODE:** By modeling the underlying derivatives, the Neural ODE accurately captures the spiral dynamics, maintaining the correct trajectory even in the unobserved region.

vector is a concatenation of the position  $x \in \mathbb{R}^3$ , rotation quaternion  $r \in \mathbb{R}^4$ , scaling  $s \in \mathbb{R}^3$ , opacity  $\alpha \in \mathbb{R}^1$ , and the 0-th order of the Spherical Harmonics coefficients  $sh \in \mathbb{R}^3$ . This compact representation enables the encoder to extract both geometric and photometric cues effectively.

**Dynamics Latent Space Encoder  $f_{\text{encoder}}$ :** The encoder is designed to extract particle-level static features and system-level dynamic fields. It consists of 4 stacked attention layers, each with a hidden dimension of 256, employing GELU as the activation function. To handle the unstructured nature of 3D Gaussian clouds, we construct local Gaussian patches using Farthest Point Sampling (FPS) and  $k$ -nearest neighbors (k-NN). We employ FPS to select representative anchor points from the Gaussian cloud. For

synthetic datasets, we sample  $N_k = 2048$  keypoints. For real-world datasets which typically contain more complex geometries and background noise, we increase the sampling density to  $N_k = 4096$ . For each keypoint, we query its  $k = 32$  nearest neighbors (k-NN) based on Euclidean distance to form a local patch. To adapt to the changing Gaussian distribution, we regenerate these neighborhood patches immediately after every densification step or at a fixed interval of 500 iterations.

This hierarchical design ensures efficient information aggregation across the scene.

**Neural ODE Dynamics Evolver  $f_{\text{evolver}}$ :** The evolver is the core component for modeling continuous-time dynamics. We implement  $f_{\text{evolver}}$  using a network composed of two stacked 3-layer MLP blocks equipped with residual connections to facilitate gradient flow. All hidden layers maintain a dimension of 128 and use GELU activation. We utilize the Runge-Kutta 4 (RK4) method as the ODE solver to integrate the learned derivative function.

**Gaussian Kernel Space Decoder  $f_{\text{decoder}}$ :** We use a 6-layer MLP with a hidden dimension of 256 for all layers, using GELU as the activation function.

**Physical State Dimensions.** We set the dimension of the static features  $L$  to 16 and the dimension of each dynamic field  $G$  to 16.

**Optimization.** We train our framework using the Adam optimizer and adopt a progressive training strategy. The total training iterations are set to 40,000 for synthetic datasets and 60,000 for real-world datasets. For 0-3k iterations: We adopt Geometry Warm-up and optimize only the static Gaussian parameters to obtain a reliable canonical geometry. For 3k-7k iterations: We adopt Dynamics Warm-up, where we freeze the canonical Gaussians and optimize the ParticleGS network with a gradually increasing temporal window. For 7k-40k/60k iterations: Both the canonical Gaussians and the neural networks are jointly optimized to refine fine-grained details until the end of training.

## 4. Rodrigues' Rotation Formula

In our framework, the decoder predicts a rotation vector  $R \in \mathbb{R}^3$  (representing the axis-angle notation) to model the rotational dynamics. To apply this rotation to the 3D Gaussians, we convert  $R$  into a valid rotation matrix  $\text{Rod}(R) \in \mathbb{R}^{3 \times 3}$  using Rodrigues' rotation formula. Given the rotation vector  $R = [r_x, r_y, r_z]^T$ , the rotation angle  $\theta$  is defined as its Euclidean norm:

$$\theta = \|R\|_2. \quad (1)$$

If  $\theta$  is non-zero, the normalized rotation axis  $K = [k_x, k_y, k_z]^T$  is computed as  $K = R/\theta$ . We first define the skew-symmetric matrix  $[K]_{\times}$  associated with the unit

vector  $K$ :

$$[K]_{\times} = \begin{bmatrix} 0 & -k_z & k_y \\ k_z & 0 & -k_x \\ -k_y & k_x & 0 \end{bmatrix}. \quad (2)$$

Rodrigues' rotation formula then expresses the rotation matrix  $\text{Rod}(R)$  as:

$$\text{Rod}(R) = I + \sin \theta [K]_{\times} + (1 - \cos \theta) [K]_{\times}^2, \quad (3)$$

where  $I$  is the  $3 \times 3$  identity matrix.

## 5. Additional Qualitative Comparisons

We provide additional visual comparisons across various datasets in Fig. 2 through Fig. 7. The **red bounding boxes** in the figures mark the regions with ground truth motion, serving as a visual reference for the object's actual position and movement trajectory. The **bottom section** of each sub-figure displays details of specific regions.

## 6. Full Quantitative Results

We report the complete quantitative results for both reconstruction and extrapolation tasks. Detailed metrics, including PSNR, SSIM, and LPIPS, are provided for every scene in the datasets to ensure a thorough evaluation.

### 6.1. Full Results on Dynamic Object Dataset

Table 1 presents the detailed quantitative comparisons on the Dynamic Object Dataset, which includes scenes such as Falling Ball, Bat, Fan, Telescope, Shark, and Whale.

### 6.2. Full Results on Dynamic Indoor Scene Dataset

The results for the Dynamic Indoor Scene Dataset are summarized in Table 2. This dataset features complex background geometries and lighting conditions, represented by scenes like Gnome House, Chessboard, Factory, and Dining Table.

### 6.3. Full Results on Dynamic Multipart Dataset

We also evaluate our method on the Dynamic Multipart Dataset, which includes objects exhibiting distinct part-level motion patterns, such as Folding Chair, Satellite, Stove, and Hyperbolic. The full quantitative results are shown in Table 3.

### 6.4. Full Results on FreeGave-GoPro Dataset

Finally, Table 4 details the performance on the FreeGave-GoPro Dataset, covering real-world captured scenes such as Box, Collision, Wrist Rest, Hammer, and Pen.

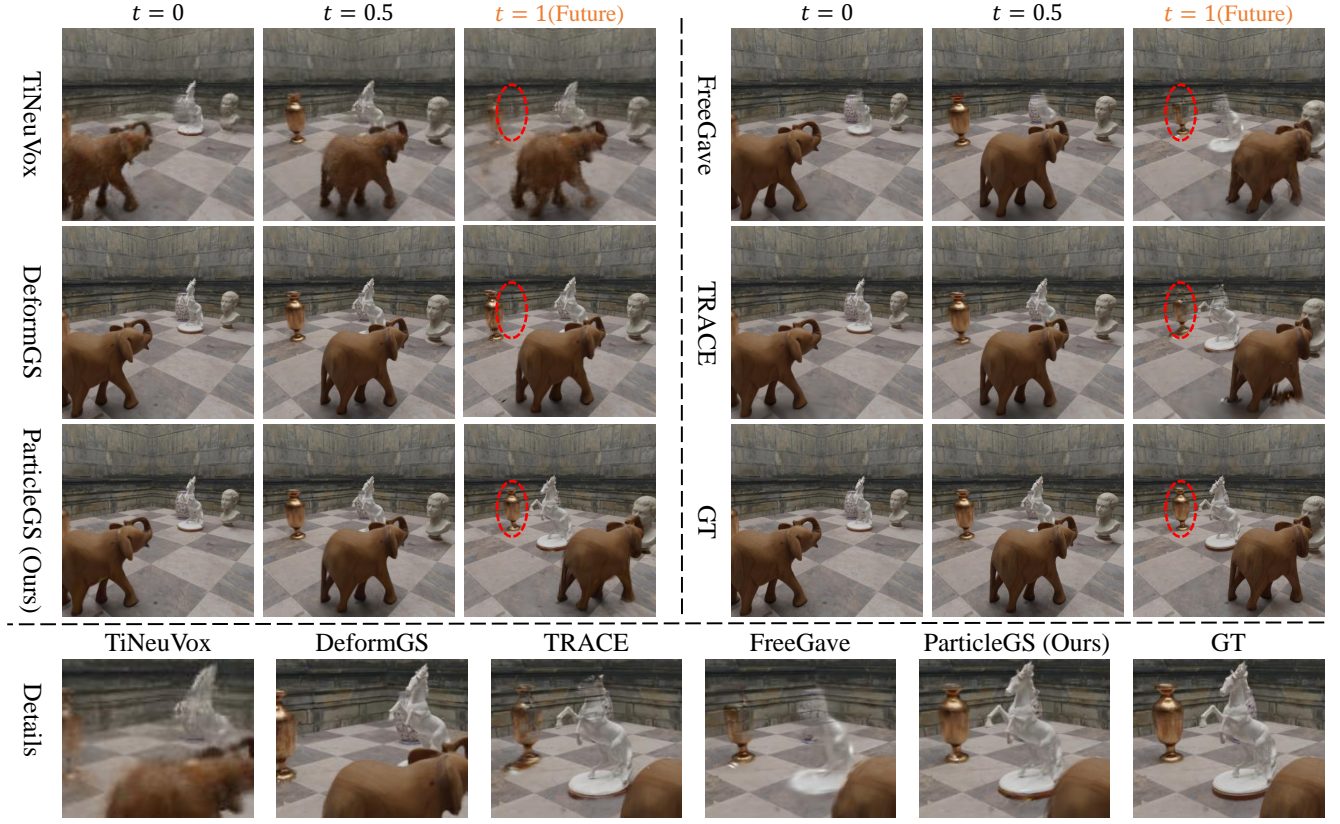

Figure 2. Additional qualitative comparisons on the Dynamic Indoor Scene Dataset.

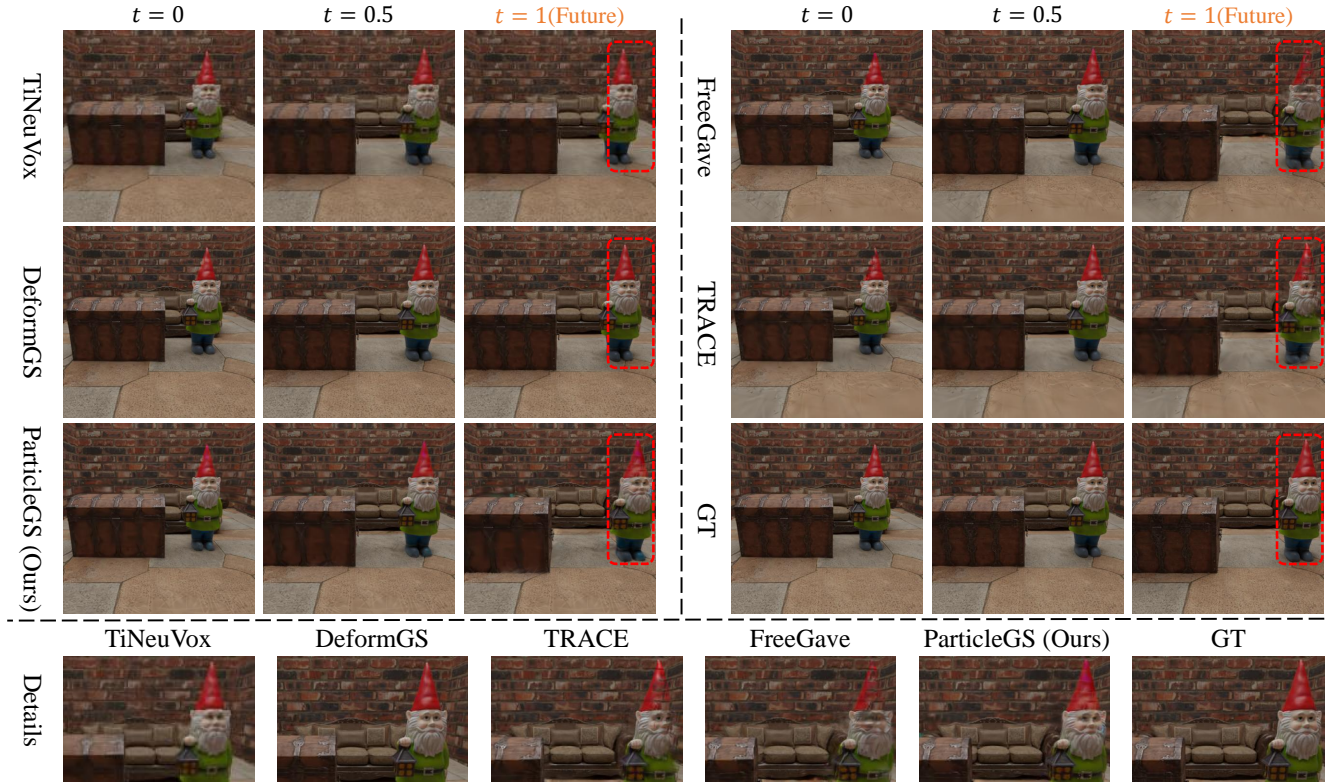

Figure 3. Additional qualitative comparisons on the Dynamic Indoor Scene Dataset.



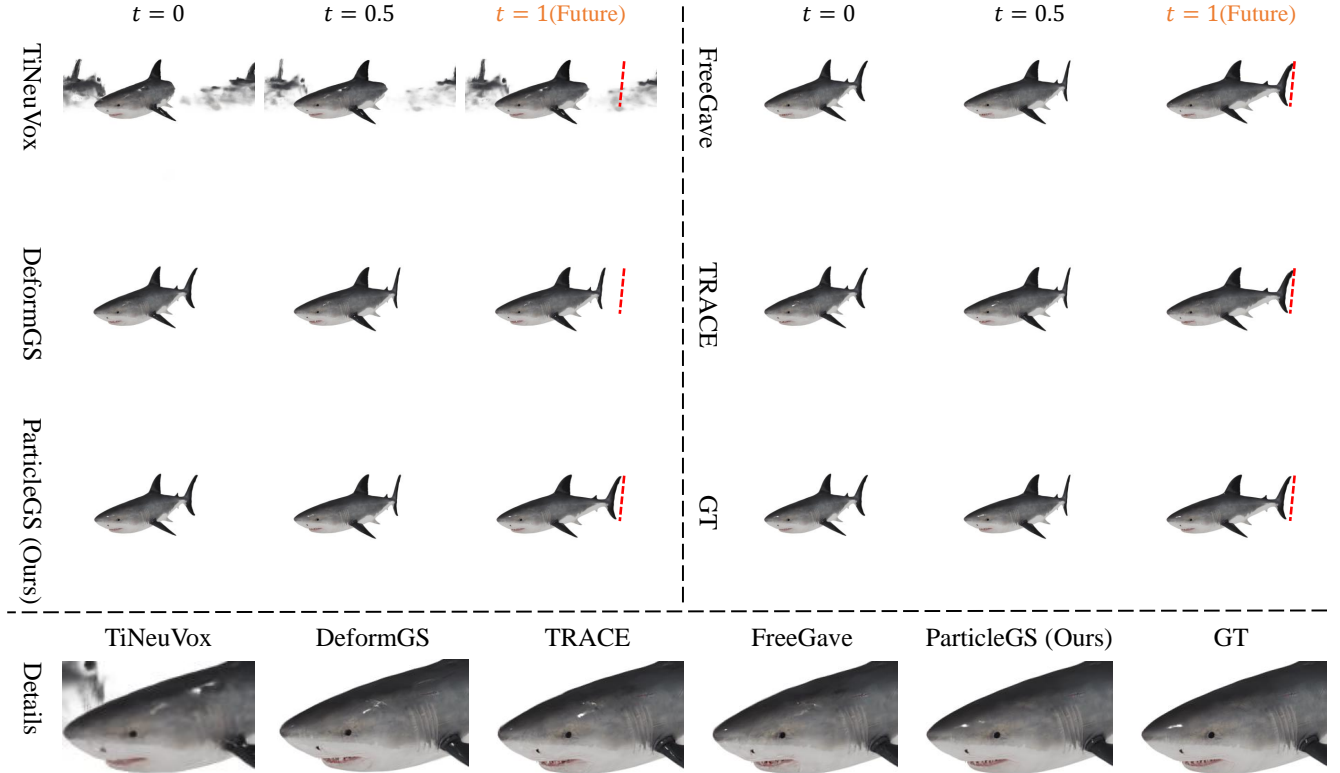

Figure 4. Additional qualitative comparisons on the Dynamic Object Dataset.

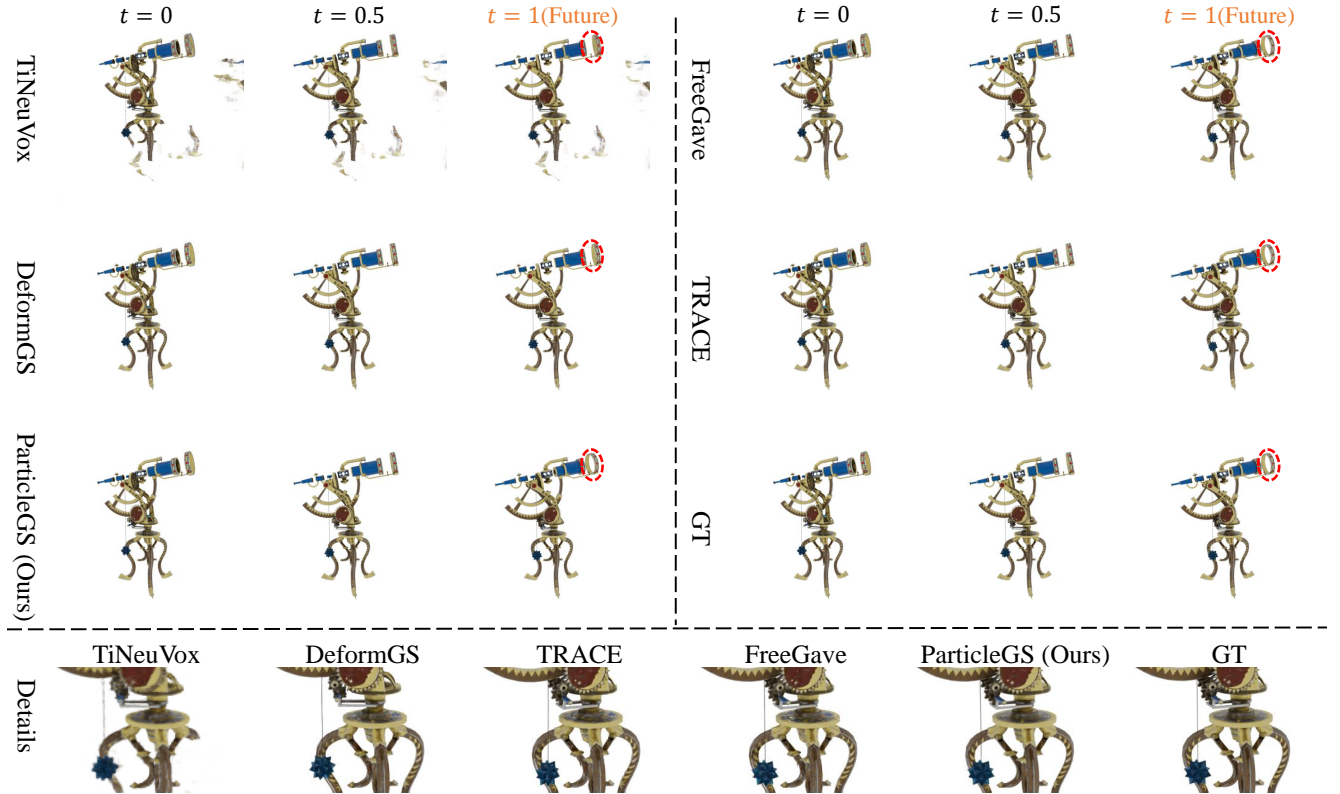

Figure 5. Additional qualitative comparisons on the Dynamic Object Dataset.

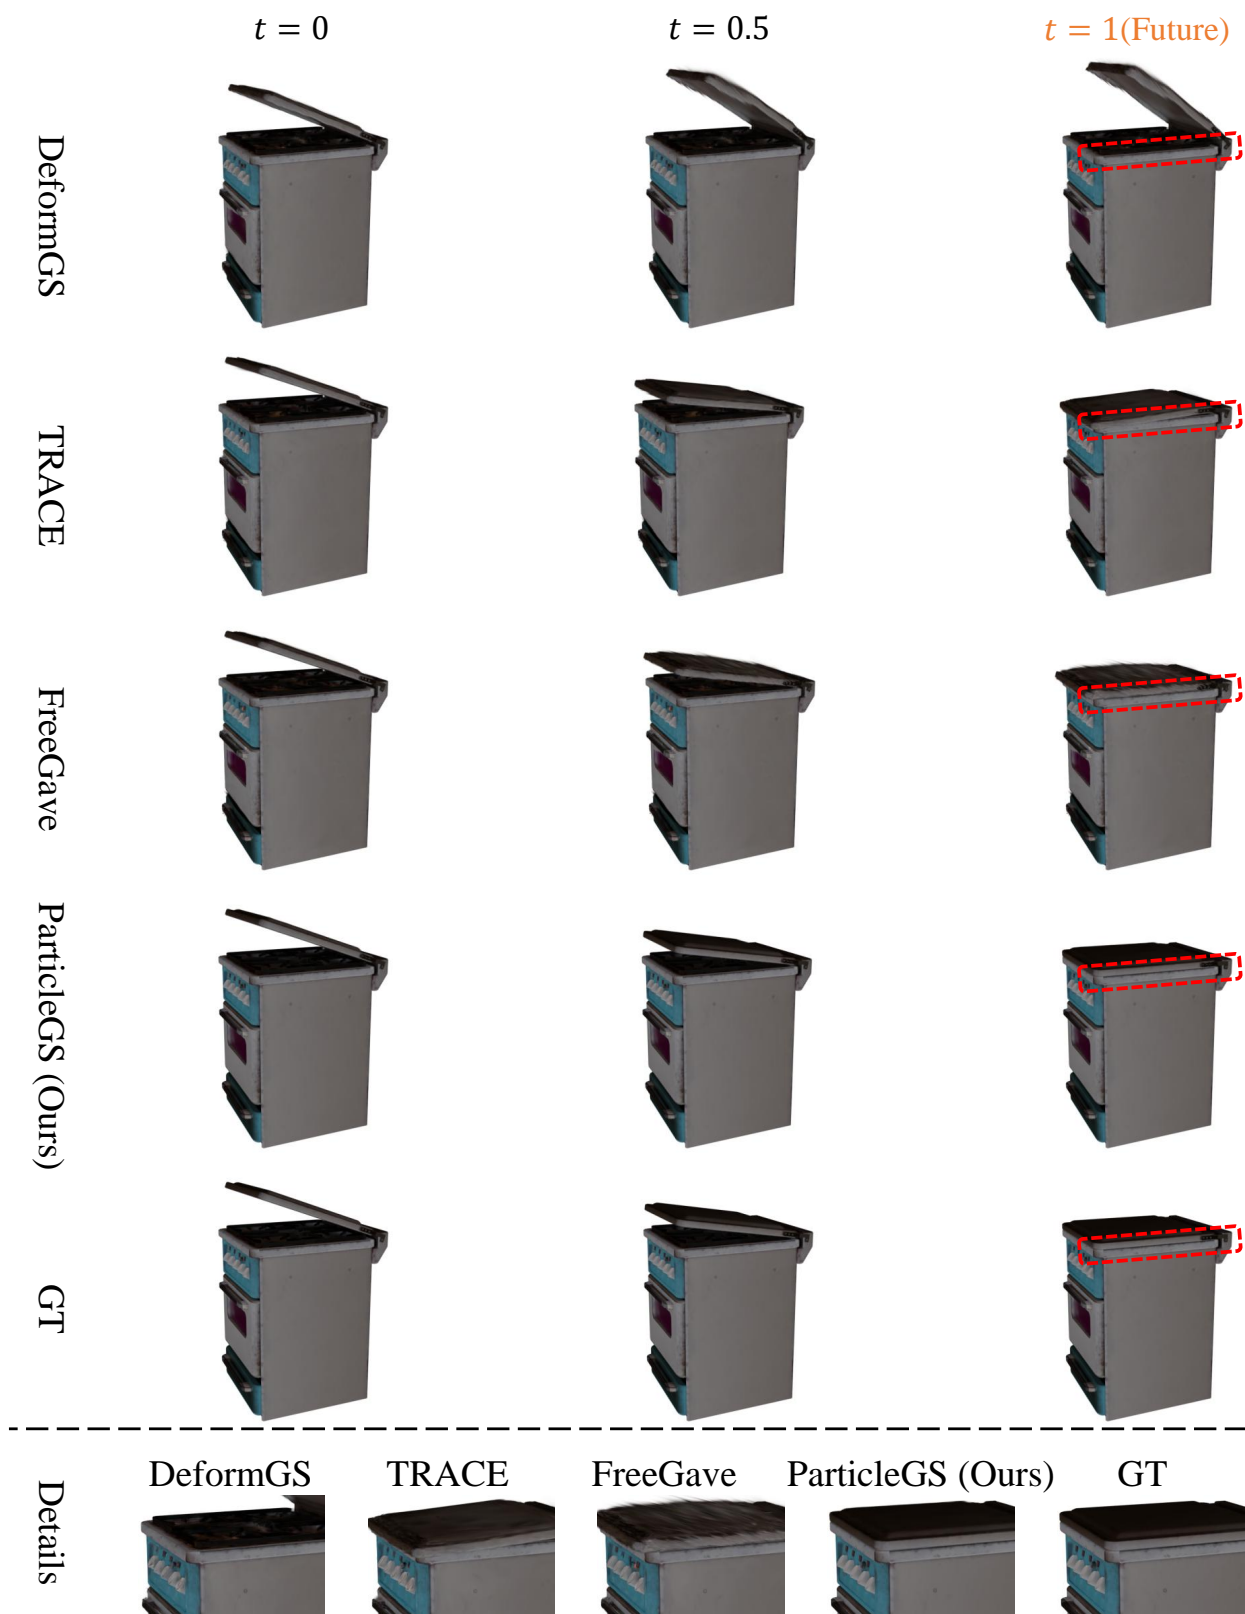

Figure 6. Additional qualitative comparisons on the Dynamic Multipart Dataset.

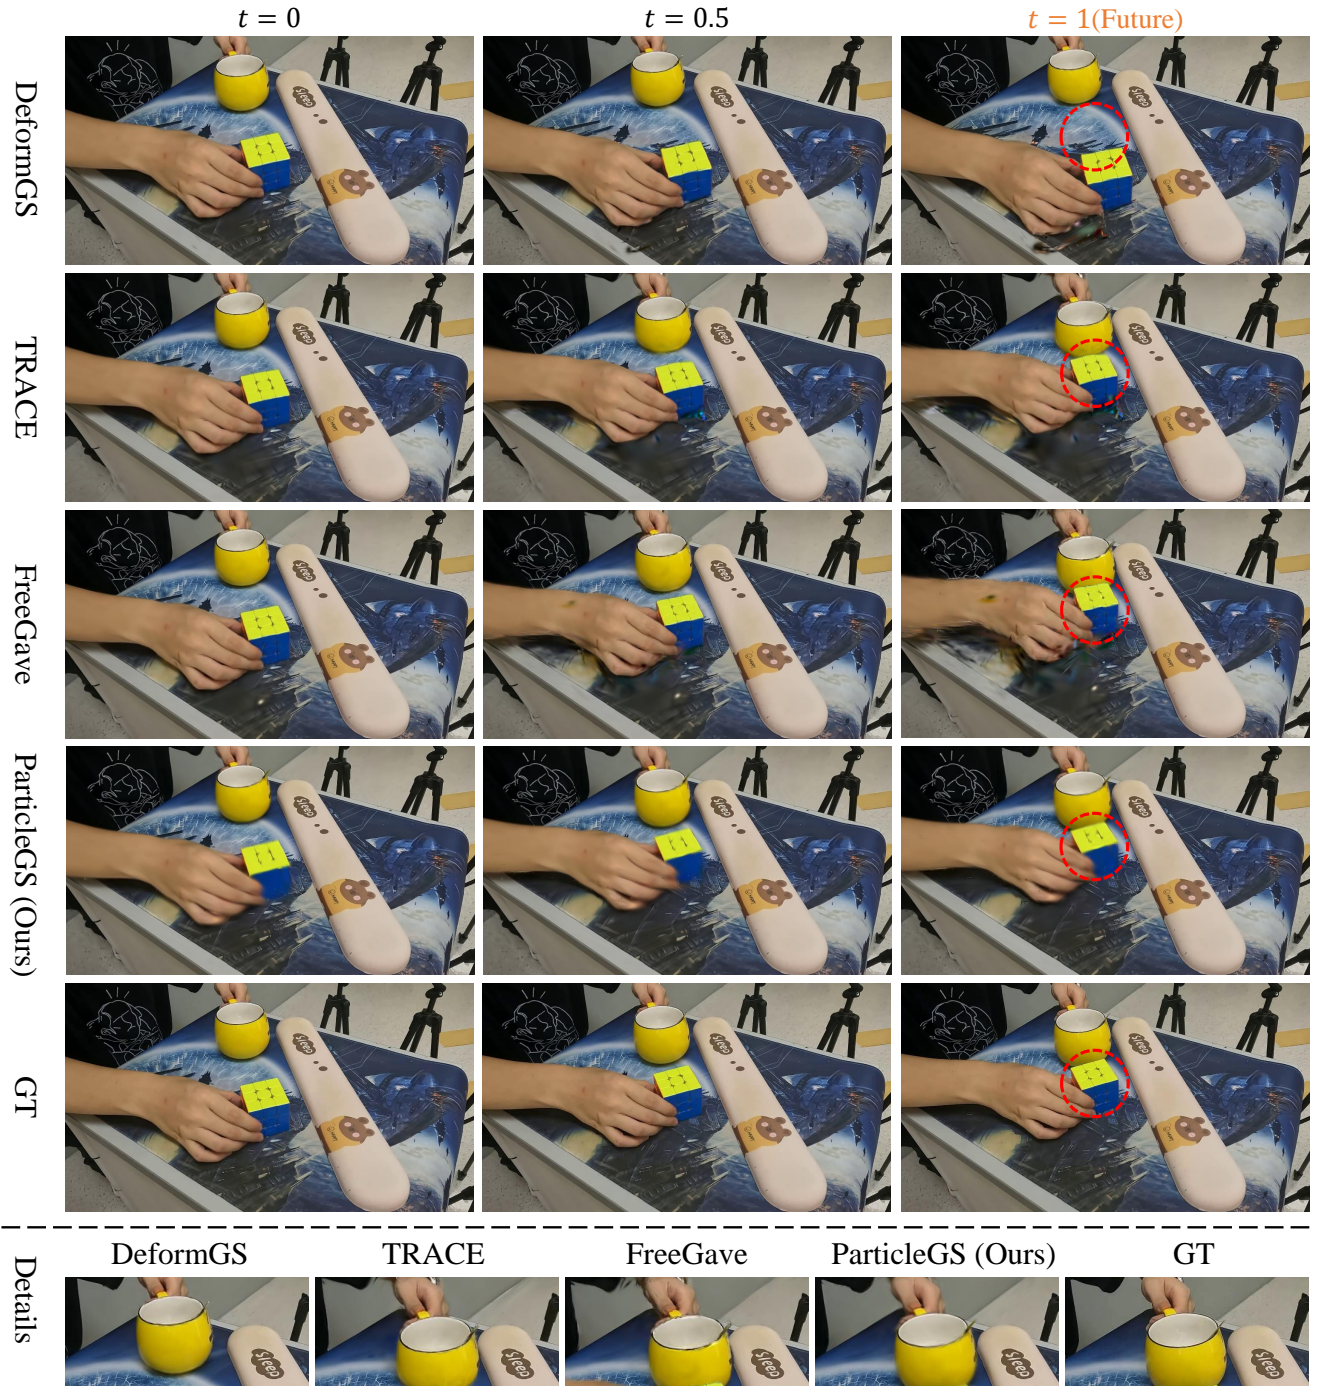

Figure 7. Additional qualitative comparisons on the FreeGave-GoPro Dataset

Table 1. Full quantitative results on the Dynamic Objects, rendered at the source resolution. **Bold** and underline indicate the best and second best performance.

| Method            | Falling Ball   |              |              |               |              |              | Bat            |              |              |               |              |              |
|-------------------|----------------|--------------|--------------|---------------|--------------|--------------|----------------|--------------|--------------|---------------|--------------|--------------|
|                   | Reconstruction |              |              | Extrapolation |              |              | Reconstruction |              |              | Extrapolation |              |              |
|                   | PSNR↑          | SSIM↑        | LPIPS↓       | PSNR↑         | SSIM↑        | LPIPS↓       | PSNR↑          | SSIM↑        | LPIPS↓       | PSNR↑         | SSIM↑        | LPIPS↓       |
| HexPlane          | 19.754         | 0.816        | 0.215        | 20.166        | 0.906        | 0.130        | 22.099         | 0.953        | 0.080        | 22.422        | 0.954        | 0.061        |
| TiNeuVox          | 24.323         | 0.894        | 0.167        | 20.474        | 0.940        | 0.098        | 17.611         | 0.946        | 0.076        | 17.139        | 0.947        | 0.070        |
| DeformGS          | 17.736         | 0.830        | 0.156        | 26.384        | 0.945        | 0.060        | <u>47.034</u>  | <u>0.996</u> | 0.004        | 27.109        | 0.944        | 0.034        |
| Grid4D            | 19.119         | 0.821        | 0.153        | 24.926        | 0.925        | 0.069        | <b>47.443</b>  | <b>0.997</b> | 0.004        | 29.551        | 0.953        | 0.290        |
| NVFi              | 34.900         | 0.969        | 0.068        | 27.013        | 0.966        | 0.074        | 24.648         | 0.970        | 0.044        | 25.529        | 0.973        | 0.040        |
| GSPrediction      | 24.549         | 0.910        | 0.154        | 16.790        | 0.830        | 0.238        | 43.290         | <b>0.997</b> | <b>0.002</b> | 23.495        | 0.952        | 0.075        |
| TRACE             | <u>41.077</u>  | <u>0.995</u> | 0.017        | <b>38.126</b> | <u>0.993</u> | 0.020        | 39.269         | 0.995        | 0.006        | 28.890        | <u>0.982</u> | 0.016        |
| FreeGave          | <b>42.248</b>  | <b>0.996</b> | <u>0.015</u> | 37.460        | <b>0.994</b> | <u>0.015</u> | 39.516         | 0.995        | 0.006        | <u>30.907</u> | 0.980        | <u>0.014</u> |
| <b>ParticleGS</b> | 38.275         | 0.991        | <b>0.010</b> | <u>38.067</u> | 0.990        | <b>0.013</b> | 43.232         | <b>0.997</b> | <u>0.003</u> | <b>36.348</b> | <b>0.984</b> | <b>0.011</b> |

  

| Method            | Fan            |              |              |               |              |              | Telescope      |              |              |               |              |              |
|-------------------|----------------|--------------|--------------|---------------|--------------|--------------|----------------|--------------|--------------|---------------|--------------|--------------|
|                   | Reconstruction |              |              | Extrapolation |              |              | Reconstruction |              |              | Extrapolation |              |              |
|                   | PSNR↑          | SSIM↑        | LPIPS↓       | PSNR↑         | SSIM↑        | LPIPS↓       | PSNR↑          | SSIM↑        | LPIPS↓       | PSNR↑         | SSIM↑        | LPIPS↓       |
| HexPlane          | 18.424         | 0.842        | 0.190        | 19.998        | 0.887        | 0.106        | 21.814         | 0.917        | 0.149        | 23.667        | 0.931        | 0.082        |
| TiNeuVox          | 15.775         | 0.855        | 0.189        | 21.307        | 0.919        | 0.081        | 23.088         | 0.949        | 0.084        | 20.801        | 0.925        | 0.071        |
| DeformGS          | <u>38.083</u>  | 0.973        | 0.026        | 24.473        | 0.930        | 0.047        | 38.435         | 0.992        | <u>0.005</u> | 23.186        | 0.934        | 0.037        |
| Grid4D            | 37.031         | 0.967        | 0.030        | 26.720        | 0.941        | 0.044        | 38.488         | 0.992        | <u>0.006</u> | 25.696        | 0.942        | 0.033        |
| NVFi              | 27.748         | 0.953        | 0.059        | 27.347        | 0.957        | 0.054        | 26.889         | 0.955        | 0.051        | 26.861        | 0.955        | 0.053        |
| GSPrediction      | 34.864         | <u>0.976</u> | <b>0.020</b> | 20.747        | 0.935        | 0.054        | 36.191         | 0.992        | <b>0.004</b> | 22.018        | 0.939        | 0.043        |
| TRACE             | 34.038         | 0.975        | 0.023        | <b>36.779</b> | <b>0.984</b> | <b>0.014</b> | <b>38.839</b>  | <b>0.994</b> | 0.006        | 35.725        | <u>0.980</u> | 0.006        |
| FreeGave          | 34.158         | 0.975        | 0.022        | 33.987        | <u>0.974</u> | <u>0.016</u> | 38.737         | <b>0.994</b> | 0.006        | <u>36.407</u> | <b>0.991</b> | <u>0.005</u> |
| <b>ParticleGS</b> | <b>38.852</b>  | <b>0.979</b> | <u>0.021</u> | <u>34.235</u> | <u>0.974</u> | 0.023        | <u>38.770</u>  | <u>0.993</u> | <b>0.004</b> | <b>38.294</b> | <b>0.991</b> | <b>0.004</b> |

  

| Method            | Shark          |              |              |               |              |              | Whale          |              |              |               |              |              |
|-------------------|----------------|--------------|--------------|---------------|--------------|--------------|----------------|--------------|--------------|---------------|--------------|--------------|
|                   | Reconstruction |              |              | Extrapolation |              |              | Reconstruction |              |              | Extrapolation |              |              |
|                   | PSNR↑          | SSIM↑        | LPIPS↓       | PSNR↑         | SSIM↑        | LPIPS↓       | PSNR↑          | SSIM↑        | LPIPS↓       | PSNR↑         | SSIM↑        | LPIPS↓       |
| HexPlane          | 22.736         | 0.956        | 0.064        | 24.180        | 0.962        | 0.041        | 24.684         | 0.976        | 0.049        | 24.075        | 0.964        | 0.049        |
| TiNeuVox          | 19.592         | 0.951        | 0.058        | 16.683        | 0.933        | 0.096        | 21.281         | 0.969        | 0.052        | 20.671        | 0.945        | 0.063        |
| DeformGS          | <u>40.492</u>  | <b>0.995</b> | <u>0.008</u> | 29.159        | 0.966        | 0.022        | <u>42.475</u>  | <b>0.996</b> | <b>0.004</b> | 26.666        | 0.959        | 0.027        |
| Grid4D            | <b>40.752</b>  | <b>0.995</b> | <b>0.007</b> | 30.904        | 0.966        | 0.021        | <b>42.666</b>  | <b>0.996</b> | <b>0.004</b> | 28.246        | 0.967        | 0.020        |
| NVFi              | 31.374         | <u>0.982</u> | 0.035        | 28.649        | 0.979        | 0.033        | 30.778         | 0.984        | 0.025        | 25.529        | 0.977        | 0.029        |
| GSPrediction      | 40.015         | <b>0.995</b> | 0.010        | 30.280        | 0.971        | 0.032        | 39.540         | <b>0.996</b> | <u>0.005</u> | 25.596        | 0.965        | 0.046        |
| TRACE             | 38.637         | <b>0.995</b> | 0.009        | 30.547        | <u>0.982</u> | 0.012        | 36.177         | 0.994        | 0.006        | 30.068        | <u>0.980</u> | <u>0.013</u> |
| FreeGave          | 39.378         | <b>0.995</b> | 0.009        | <u>31.639</u> | 0.979        | <u>0.011</u> | 37.788         | 0.994        | 0.006        | <u>31.395</u> | <u>0.980</u> | <b>0.012</b> |
| <b>ParticleGS</b> | 40.322         | <b>0.995</b> | <u>0.008</u> | <b>37.475</b> | <b>0.983</b> | <b>0.010</b> | 39.241         | <u>0.995</u> | <u>0.005</u> | <b>34.236</b> | <b>0.983</b> | <b>0.012</b> |

Table 2. Full quantitative results on Dynamic Indoor Scene dataset, rendered at the source resolution. **Bold** and underline indicate the best and second best performance.

| Method            | Gnome House    |              |              |               |              |              | Chessboard     |              |              |               |              |              |
|-------------------|----------------|--------------|--------------|---------------|--------------|--------------|----------------|--------------|--------------|---------------|--------------|--------------|
|                   | Reconstruction |              |              | Extrapolation |              |              | Reconstruction |              |              | Extrapolation |              |              |
|                   | PSNR↑          | SSIM↑        | LPIPS↓       | PSNR↑         | SSIM↑        | LPIPS↓       | PSNR↑          | SSIM↑        | LPIPS↓       | PSNR↑         | SSIM↑        | LPIPS↓       |
| HexPlane          | 18.060         | 0.419        | 0.650        | 23.341        | 0.601        | 0.530        | 18.054         | 0.515        | 0.617        | 22.034        | 0.680        | 0.500        |
| TiNeuVox          | <b>24.644</b>  | <b>0.663</b> | 0.385        | 21.359        | 0.665        | 0.357        | <u>23.847</u>  | <u>0.698</u> | 0.392        | 20.088        | 0.676        | 0.408        |
| DeformGS          | 21.855         | 0.611        | <u>0.341</u> | 22.728        | 0.731        | <u>0.196</u> | 20.688         | 0.659        | 0.443        | 20.484        | 0.773        | 0.280        |
| Grid4D            | 22.418         | 0.588        | 0.360        | 21.185        | 0.696        | <u>0.258</u> | 21.545         | 0.667        | 0.437        | 19.713        | 0.741        | 0.331        |
| NVFi              | 16.857         | 0.435        | 0.687        | 24.087        | 0.615        | 0.546        | 17.515         | 0.551        | 0.651        | 22.571        | 0.672        | 0.539        |
| GSPrediction      | 16.113         | 0.556        | 0.632        | 20.098        | 0.641        | 0.371        | 17.665         | 0.651        | 0.470        | 20.033        | 0.724        | 0.317        |
| TRACE             | 22.968         | 0.642        | 0.351        | <u>29.325</u> | <u>0.840</u> | 0.209        | 22.969         | 0.642        | <u>0.352</u> | <u>29.326</u> | 0.840        | <u>0.209</u> |
| FreeGave          | 19.178         | 0.543        | 0.425        | 28.962        | 0.827        | 0.217        | 19.905         | 0.674        | 0.471        | 26.339        | <u>0.862</u> | 0.251        |
| <b>ParticleGS</b> | <u>24.481</u>  | <u>0.662</u> | <b>0.307</b> | <b>31.167</b> | <b>0.843</b> | <b>0.160</b> | <b>25.449</b>  | <b>0.785</b> | <b>0.287</b> | <b>29.529</b> | <b>0.898</b> | <b>0.153</b> |

  

| Method            | Factory        |              |              |               |              |              | Dining Table   |              |              |               |              |              |
|-------------------|----------------|--------------|--------------|---------------|--------------|--------------|----------------|--------------|--------------|---------------|--------------|--------------|
|                   | Reconstruction |              |              | Extrapolation |              |              | Reconstruction |              |              | Extrapolation |              |              |
|                   | PSNR↑          | SSIM↑        | LPIPS↓       | PSNR↑         | SSIM↑        | LPIPS↓       | PSNR↑          | SSIM↑        | LPIPS↓       | PSNR↑         | SSIM↑        | LPIPS↓       |
| HexPlane          | 19.109         | 0.479        | 0.637        | 24.266        | 0.677        | 0.470        | 16.687         | 0.516        | 0.601        | 23.127        | 0.725        | 0.395        |
| TiNeuVox          | <u>24.857</u>  | <u>0.705</u> | 0.346        | 22.467        | 0.747        | 0.292        | <u>21.476</u>  | <u>0.658</u> | <b>0.368</b> | 20.529        | 0.768        | 0.276        |
| DeformGS          | 21.703         | 0.621        | 0.376        | 23.471        | 0.787        | <u>0.196</u> | 15.832         | 0.488        | 0.621        | 21.244        | 0.784        | 0.258        |
| Grid4D            | 21.822         | 0.631        | 0.377        | 22.119        | 0.765        | 0.235        | 16.407         | 0.475        | 0.595        | 19.516        | 0.741        | 0.313        |
| NVFi              | 18.889         | 0.503        | 0.655        | 25.415        | 0.690        | 0.496        | 15.206         | 0.485        | 0.681        | 22.790        | 0.711        | 0.428        |
| GSPrediction      | 17.388         | 0.588        | 0.609        | 21.723        | 0.713        | 0.308        | 13.451         | 0.546        | 0.688        | 18.214        | 0.679        | 0.374        |
| TRACE             | 22.012         | 0.581        | 0.426        | 27.177        | 0.817        | 0.234        | <b>23.434</b>  | <b>0.705</b> | <u>0.380</u> | <u>32.078</u> | <b>0.900</b> | 0.169        |
| FreeGave          | 19.448         | 0.498        | 0.485        | <u>28.190</u> | <u>0.827</u> | 0.221        | 20.194         | 0.643        | 0.433        | <b>32.443</b> | <b>0.900</b> | <u>0.159</u> |
| <b>ParticleGS</b> | <b>31.627</b>  | <b>0.912</b> | <b>0.126</b> | <b>32.679</b> | <b>0.943</b> | <b>0.077</b> | 20.461         | 0.636        | 0.444        | 31.037        | <u>0.886</u> | <b>0.143</b> |

Table 3. Full quantitative results on the Dynamic Multipart dataset, rendered at the source resolution. **Bold** and underline indicate the best and second best performance.

| Method            | Folding Chair  |              |              |               |              |              | Satellite      |              |              |               |              |              |
|-------------------|----------------|--------------|--------------|---------------|--------------|--------------|----------------|--------------|--------------|---------------|--------------|--------------|
|                   | Reconstruction |              |              | Extrapolation |              |              | Reconstruction |              |              | Extrapolation |              |              |
|                   | PSNR↑          | SSIM↑        | LPIPS↓       | PSNR↑         | SSIM↑        | LPIPS↓       | PSNR↑          | SSIM↑        | LPIPS↓       | PSNR↑         | SSIM↑        | LPIPS↓       |
| DeformGS          | <u>41.562</u>  | <b>0.994</b> | <b>0.009</b> | 18.194        | 0.847        | 0.123        | 35.884         | 0.988        | <b>0.010</b> | 29.454        | 0.980        | 0.014        |
| FreeGave          | 39.086         | <b>0.994</b> | <u>0.010</u> | 26.043        | 0.951        | 0.037        | <u>37.155</u>  | <b>0.991</b> | <b>0.010</b> | 34.476        | <b>0.989</b> | <b>0.007</b> |
| TRACE             | 38.286         | <u>0.993</u> | 0.011        | <u>28.724</u> | <u>0.974</u> | <u>0.023</u> | 36.647         | <u>0.990</u> | <b>0.010</b> | 33.612        | <u>0.983</u> | <u>0.009</u> |
| <b>ParticleGS</b> | <b>41.620</b>  | <b>0.994</b> | <b>0.009</b> | <b>31.512</b> | <b>0.977</b> | <b>0.015</b> | <b>38.697</b>  | <b>0.991</b> | <b>0.010</b> | <b>34.562</b> | 0.981        | 0.017        |

  

| Method            | Stove          |              |              |               |              |              | Hyperbolic     |              |              |               |              |              |
|-------------------|----------------|--------------|--------------|---------------|--------------|--------------|----------------|--------------|--------------|---------------|--------------|--------------|
|                   | Reconstruction |              |              | Extrapolation |              |              | Reconstruction |              |              | Extrapolation |              |              |
|                   | PSNR↑          | SSIM↑        | LPIPS↓       | PSNR↑         | SSIM↑        | LPIPS↓       | PSNR↑          | SSIM↑        | LPIPS↓       | PSNR↑         | SSIM↑        | LPIPS↓       |
| DeformGS          | <b>40.169</b>  | 0.988        | <u>0.027</u> | 30.694        | 0.953        | 0.030        | <b>36.105</b>  | 0.983        | <b>0.031</b> | 33.614        | 0.987        | 0.015        |
| FreeGave          | 35.578         | <u>0.989</u> | 0.028        | 32.291        | <u>0.989</u> | 0.021        | 32.747         | <b>0.985</b> | 0.034        | <b>41.294</b> | <b>0.995</b> | <b>0.011</b> |
| TRACE             | 36.201         | <b>0.990</b> | 0.028        | <u>33.869</u> | <u>0.989</u> | <u>0.016</u> | 33.942         | <b>0.985</b> | 0.036        | 37.628        | <u>0.990</u> | <u>0.012</u> |
| <b>ParticleGS</b> | <u>39.115</u>  | <u>0.989</u> | <b>0.024</b> | <b>40.069</b> | <b>0.991</b> | <b>0.013</b> | <u>34.998</u>  | <u>0.984</u> | <u>0.032</u> | <u>38.399</u> | <u>0.990</u> | <u>0.012</u> |



Table 4. Full quantitative results on the FreeGave-GoPro dataset, rendered at the source resolution. **Bold** and underline indicate the best and second best performance.

| Method            | Box            |              |              |               |              |              | Collision      |              |              |               |              |              |
|-------------------|----------------|--------------|--------------|---------------|--------------|--------------|----------------|--------------|--------------|---------------|--------------|--------------|
|                   | Reconstruction |              |              | Extrapolation |              |              | Reconstruction |              |              | Extrapolation |              |              |
|                   | PSNR↑          | SSIM↑        | LPIPS↓       | PSNR↑         | SSIM↑        | LPIPS↓       | PSNR↑          | SSIM↑        | LPIPS↓       | PSNR↑         | SSIM↑        | LPIPS↓       |
| DeformGS          | 19.505         | 0.810        | 0.221        | 25.754        | 0.900        | 0.139        | <u>20.012</u>  | 0.840        | <b>0.209</b> | 18.986        | 0.810        | 0.251        |
| TRACE             | <b>20.203</b>  | <b>0.833</b> | <b>0.195</b> | 27.987        | 0.912        | <u>0.131</u> | <b>20.242</b>  | <b>0.841</b> | <b>0.209</b> | 23.447        | 0.858        | 0.193        |
| FreeGave          | 19.800         | 0.830        | <u>0.197</u> | <u>28.661</u> | <u>0.913</u> | <u>0.131</u> | 19.608         | <u>0.840</u> | 0.212        | <u>24.188</u> | <u>0.867</u> | <u>0.187</u> |
| <b>ParticleGS</b> | <u>20.122</u>  | <u>0.831</u> | <b>0.195</b> | <b>29.057</b> | <b>0.919</b> | <b>0.102</b> | 19.759         | <b>0.841</b> | <u>0.211</u> | <b>24.239</b> | <b>0.901</b> | <b>0.157</b> |

  

| Method            | Wrist Rest     |              |              |               |              |              | Hammer         |              |              |               |              |              |
|-------------------|----------------|--------------|--------------|---------------|--------------|--------------|----------------|--------------|--------------|---------------|--------------|--------------|
|                   | Reconstruction |              |              | Extrapolation |              |              | Reconstruction |              |              | Extrapolation |              |              |
|                   | PSNR↑          | SSIM↑        | LPIPS↓       | PSNR↑         | SSIM↑        | LPIPS↓       | PSNR↑          | SSIM↑        | LPIPS↓       | PSNR↑         | SSIM↑        | LPIPS↓       |
| DeformGS          | 19.498         | 0.829        | 0.222        | 19.007        | 0.808        | 0.244        | 20.067         | 0.835        | 0.198        | 23.992        | 0.896        | 0.152        |
| TRACE             | 19.079         | <u>0.833</u> | <u>0.209</u> | 22.488        | 0.845        | <u>0.204</u> | 20.077         | <b>0.842</b> | 0.195        | <b>28.924</b> | <b>0.919</b> | <u>0.137</u> |
| FreeGave          | <b>19.807</b>  | <b>0.835</b> | <b>0.208</b> | <b>23.456</b> | <b>0.853</b> | <b>0.197</b> | <b>20.407</b>  | <u>0.840</u> | <u>0.194</u> | 28.521        | <u>0.917</u> | <u>0.137</u> |
| <b>ParticleGS</b> | <u>19.613</u>  | <b>0.835</b> | <b>0.208</b> | <u>23.000</u> | <u>0.846</u> | 0.208        | <u>20.301</u>  | <b>0.842</b> | <b>0.193</b> | <u>28.816</u> | <u>0.917</u> | <b>0.136</b> |

  

| Method            | Pen1           |              |              |               |              |              | Pen2           |              |              |               |              |              |
|-------------------|----------------|--------------|--------------|---------------|--------------|--------------|----------------|--------------|--------------|---------------|--------------|--------------|
|                   | Reconstruction |              |              | Extrapolation |              |              | Reconstruction |              |              | Extrapolation |              |              |
|                   | PSNR↑          | SSIM↑        | LPIPS↓       | PSNR↑         | SSIM↑        | LPIPS↓       | PSNR↑          | SSIM↑        | LPIPS↓       | PSNR↑         | SSIM↑        | LPIPS↓       |
| DeformGS          | <b>21.180</b>  | 0.851        | <b>0.205</b> | 20.577        | 0.865        | 0.197        | <b>20.372</b>  | 0.824        | 0.217        | 21.674        | 0.870        | 0.190        |
| TRACE             | 20.977         | <u>0.854</u> | <b>0.205</b> | 26.703        | <u>0.917</u> | 0.149        | <u>20.040</u>  | <u>0.829</u> | <b>0.214</b> | 25.939        | 0.899        | 0.167        |
| FreeGave          | 20.130         | 0.853        | <u>0.206</u> | <u>27.673</u> | <b>0.923</b> | <u>0.143</u> | 19.968         | <b>0.830</b> | <u>0.215</u> | <u>26.563</u> | <u>0.903</u> | <u>0.162</u> |
| <b>ParticleGS</b> | <u>21.079</u>  | <b>0.856</b> | <b>0.205</b> | <b>27.746</b> | <b>0.923</b> | <b>0.140</b> | 19.824         | <u>0.829</u> | <u>0.215</u> | <b>27.879</b> | <b>0.910</b> | <b>0.158</b> |
